# Supplementary material for: miR-96-5p and miR-101-3p as potential intervention targets to rescue TiO2NP-induced autophagy and migration impairment of human trophoblastic cells
Source: Royal Society of Chemistry journal article supplement (doi:10.1039/c8bm00856f), 2018-01-01
Supplement: c8bm00856f1.pdf [file c8bm00856f1.pdf]

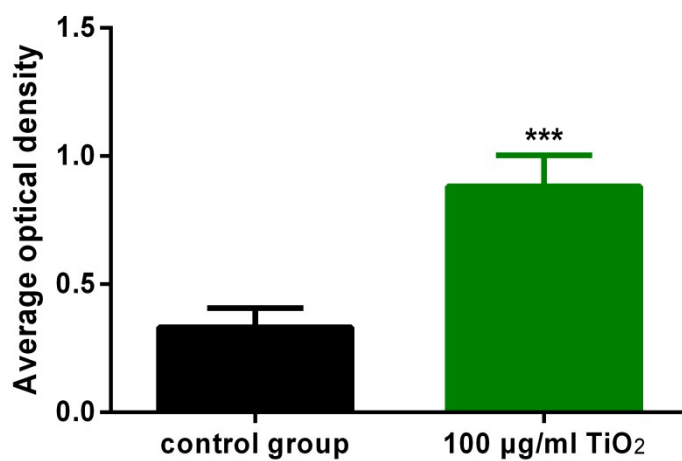

Figure S1: Fluorescent semi-quantitative analysis of autophagy levels after cells were exposed to TiO<sub>2</sub> NPs, \*\*\* means  $p < 0.001$ .

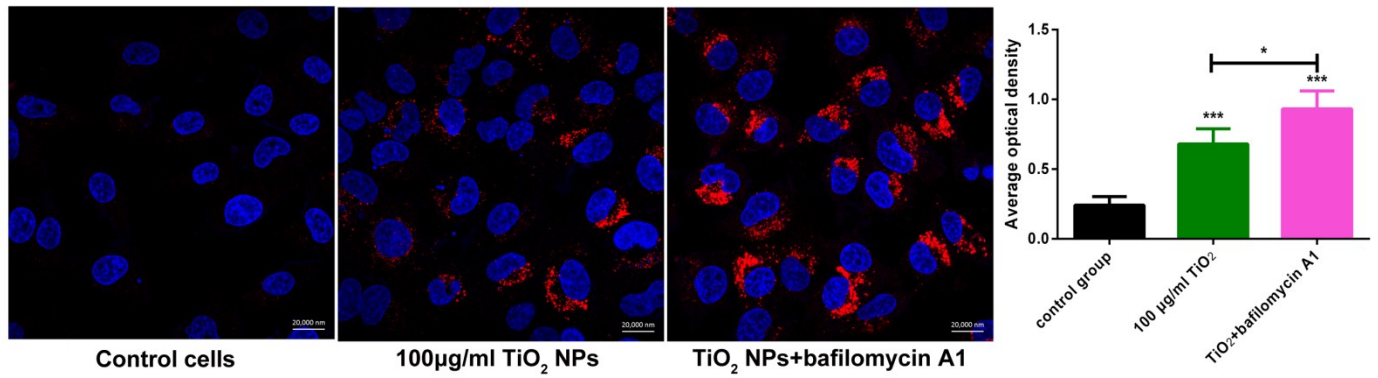

Figure S2: Immunofluorescence and semi-quantitative analysis of autophagy levels after cells were treated with TiO<sub>2</sub> NPs and bafilomycin A1, cell nuclear was stained blue with DAPI, autophagosome was stained red with CY3-conjugated antibody, \*means  $p < 0.05$ , \*\*\*means  $p < 0.001$ .

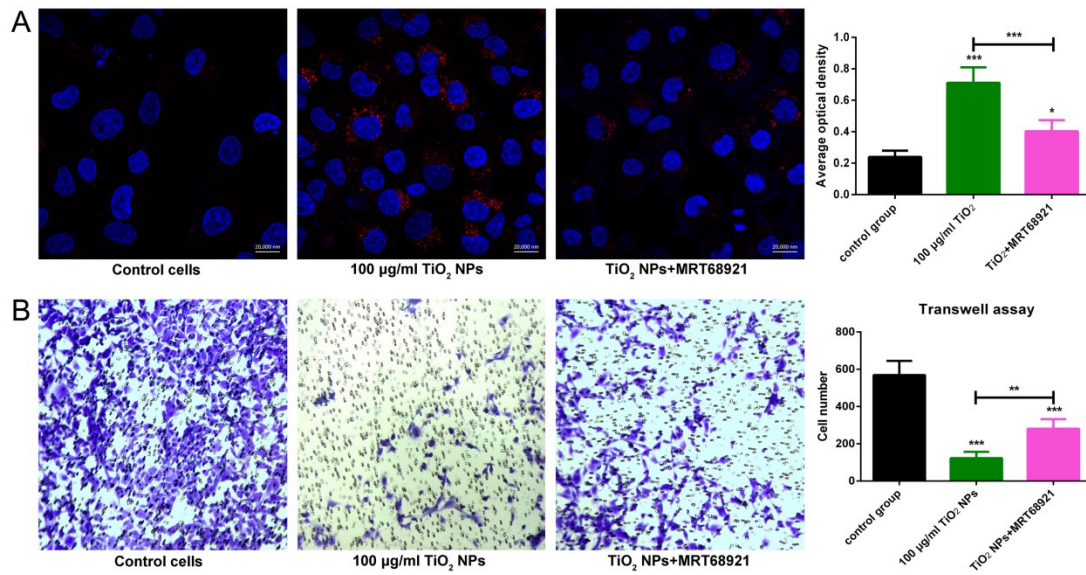

Figure S3: (A) Immunofluorescence and semi-quantitative analysis of autophagy levels after cells were treated with TiO<sub>2</sub> NPs and rapamycin. (B) Cell migration ability was evaluated with transwell assay and the penetrated cells were counted from four independent fields, data was presented as mean  $\pm$  SE. \* means  $p < 0.05$ , \*\* means  $p < 0.01$ , \*\*\* means  $p < 0.001$ .

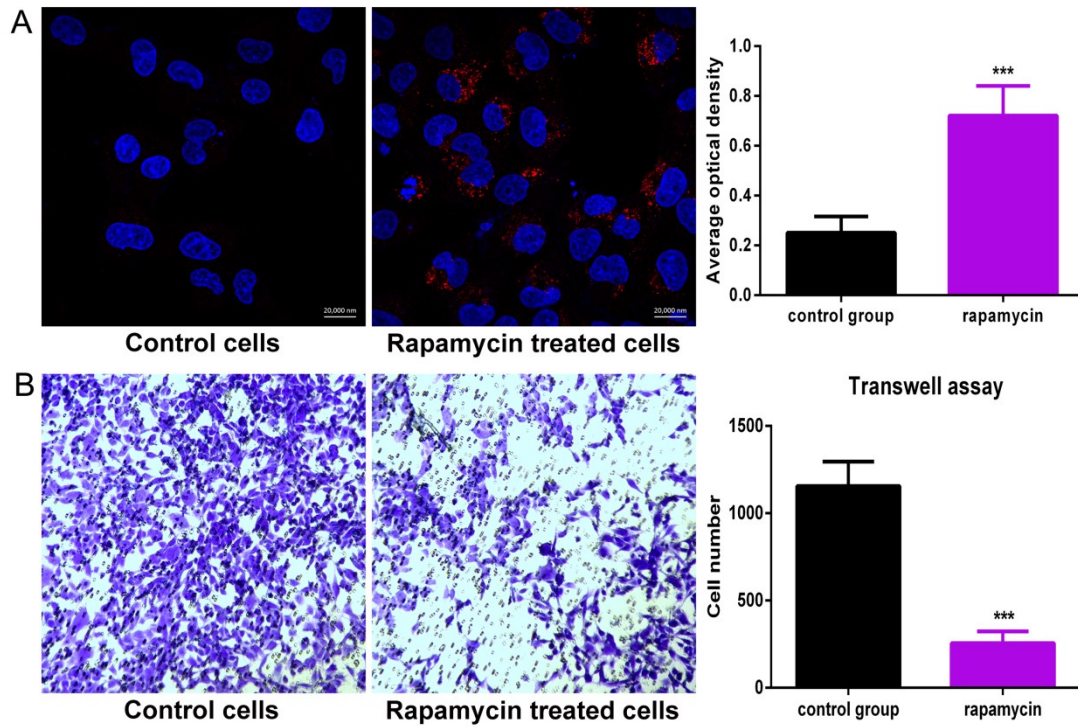

Figure S4: (A) Autophagy levels were assessed by immunofluorescence and semi-quantitative analysis of after cells were treated. (B) Cell migration ability was evaluated with transwell assay and cell numbers were counted from four independent fields, data was presented as mean  $\pm$  SE. \*\*\*means  $p < 0.001$ .

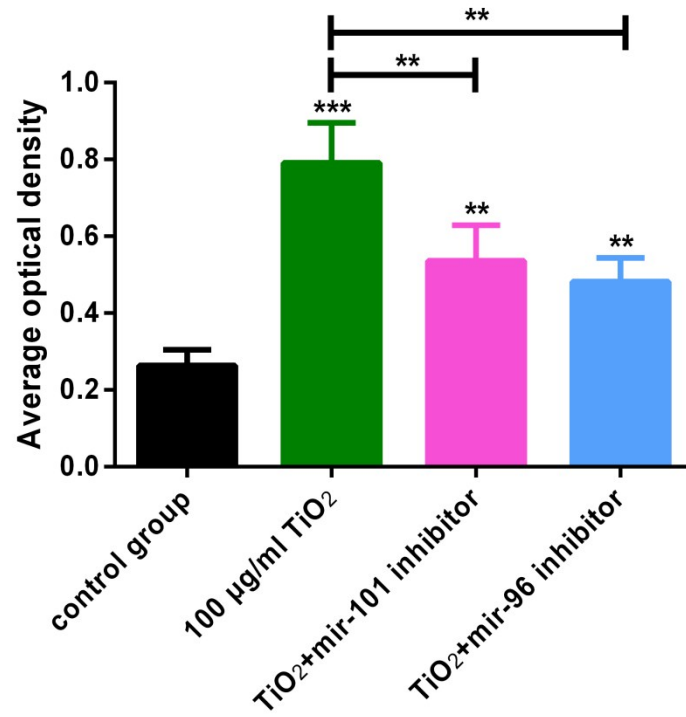

Figure S5: Fluorescent semi-quantitative analysis of autophagy levels after cells were treated with TiO<sub>2</sub> NPs and reversed with two microRNA inhibitor separately, \*\* means  $p < 0.01$ , \*\*\* means  $p < 0.001$ .

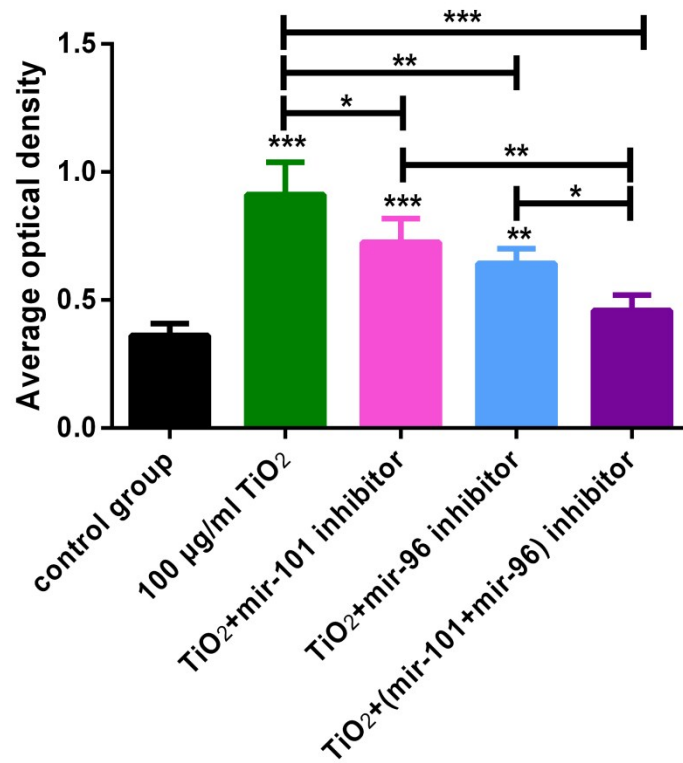

Figure S6: Fluorescent semi-quantitative analysis of autophagy levels after cells were treated with TiO<sub>2</sub> NPs and reversed with microRNA inhibitors, \* means  $p < 0.05$ , \*\* means  $p < 0.01$ , \*\*\* means  $p < 0.001$ .
